# Supplementary material
Source: Springer Nature journal article supplement (https://www.springermedizin.de/resource/supplementary/12979_2010_85_MOESM1_ESM.pdf/9603330)

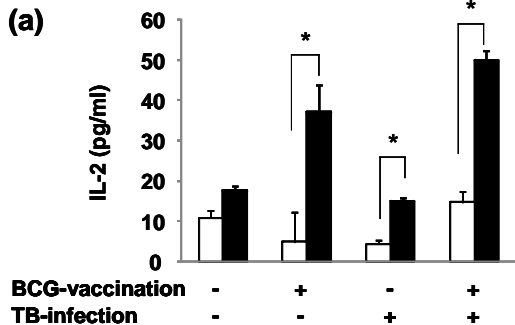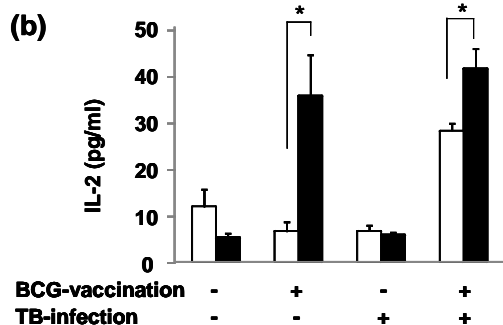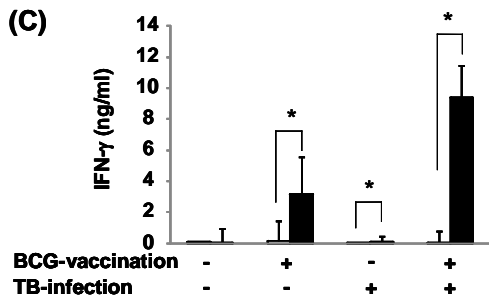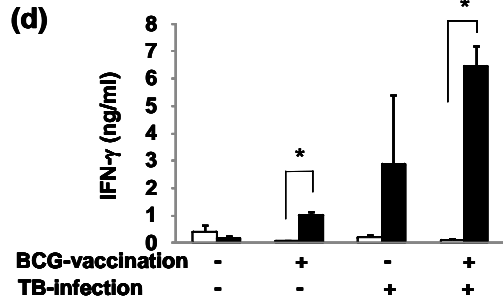

Supplement: MOESM1 [file 9603330]
